# Supplementary material for: CD8+ T cells cross-restricted by HLA-B*57 and HLA-E*01 recognize HIV Gag with different functional profiles
Source: JCI journal article supplement (doi:10.1172/jci.insight.189909), 2025-12-18
Supplement: sd1 [file 1]

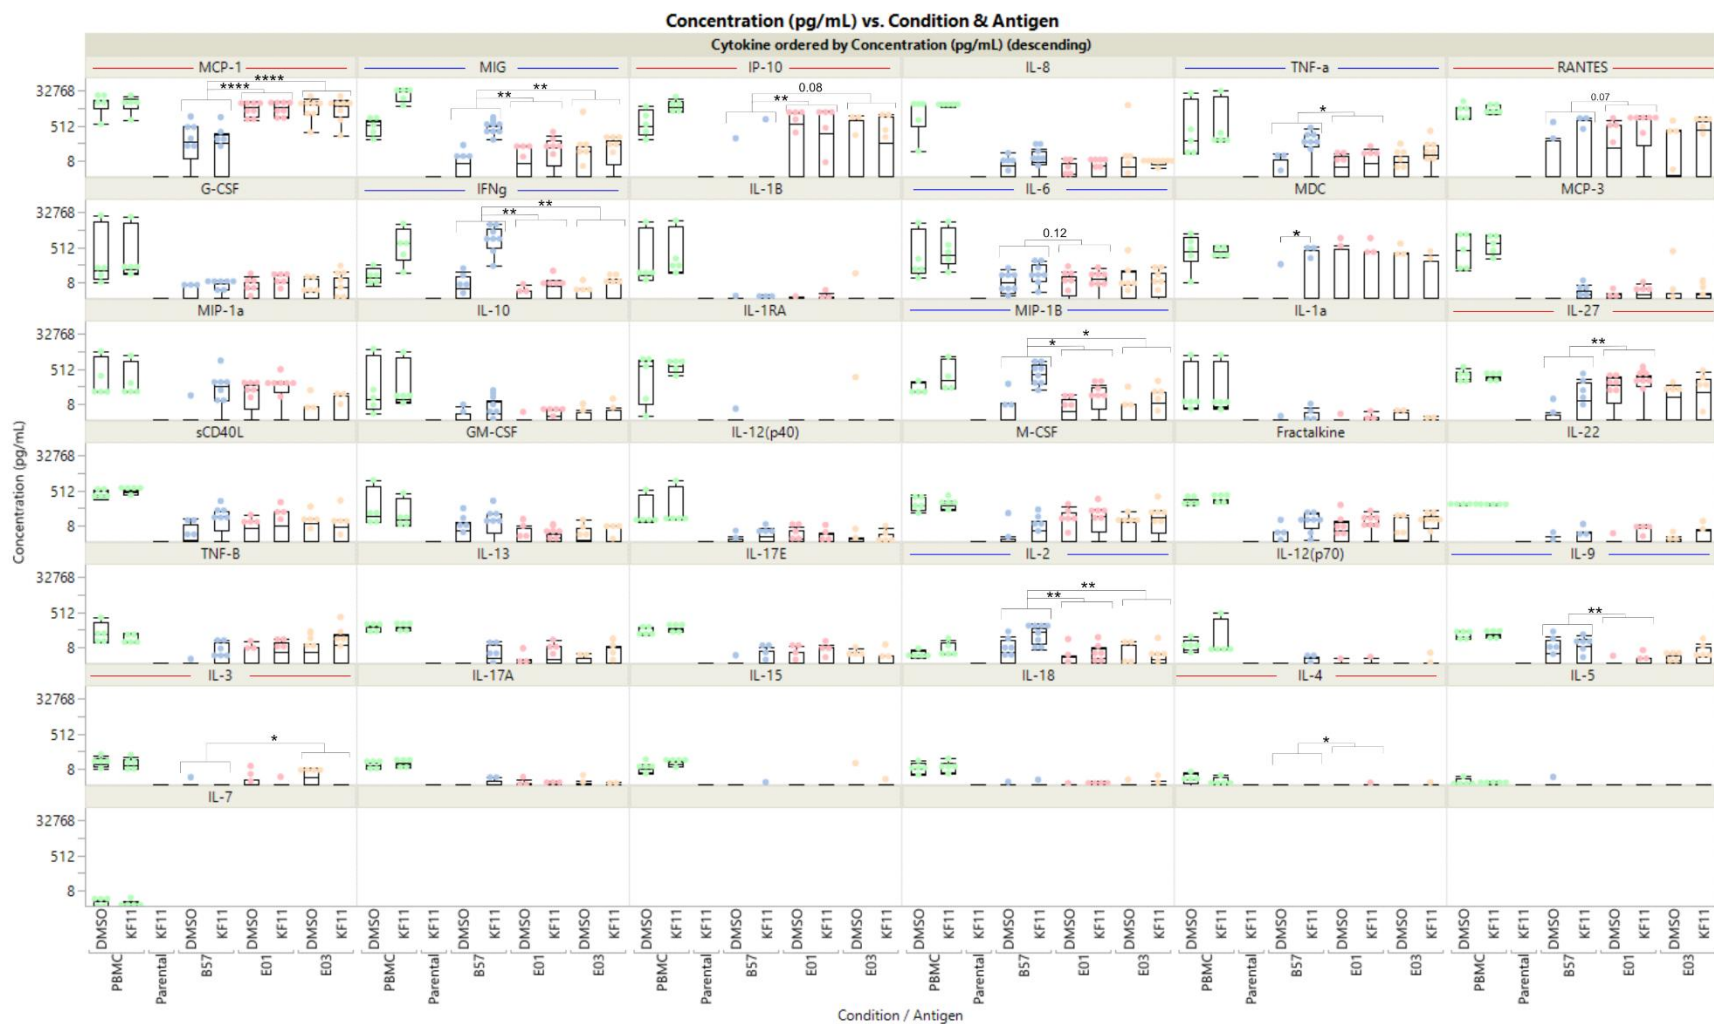

**Supplemental Figure 2: Multiplex-ELISA Cytokine and chemokine Response Summary.** Summary of all 8 HLA-class I restricted responses to either no peptide or KF11 across all responders, cytokines separated by boxes. All concentrations for each donor in each condition are normalized to Parental-cell line KF11 response (41A3.CD4 “null” cell line pulsed with KF11 and co-cultured with CD8s from all 8 donors) individually except for PBMC response. Higher HLA-B57-restricted or -E\*01:01 response is represented by a blue or red line respectively.

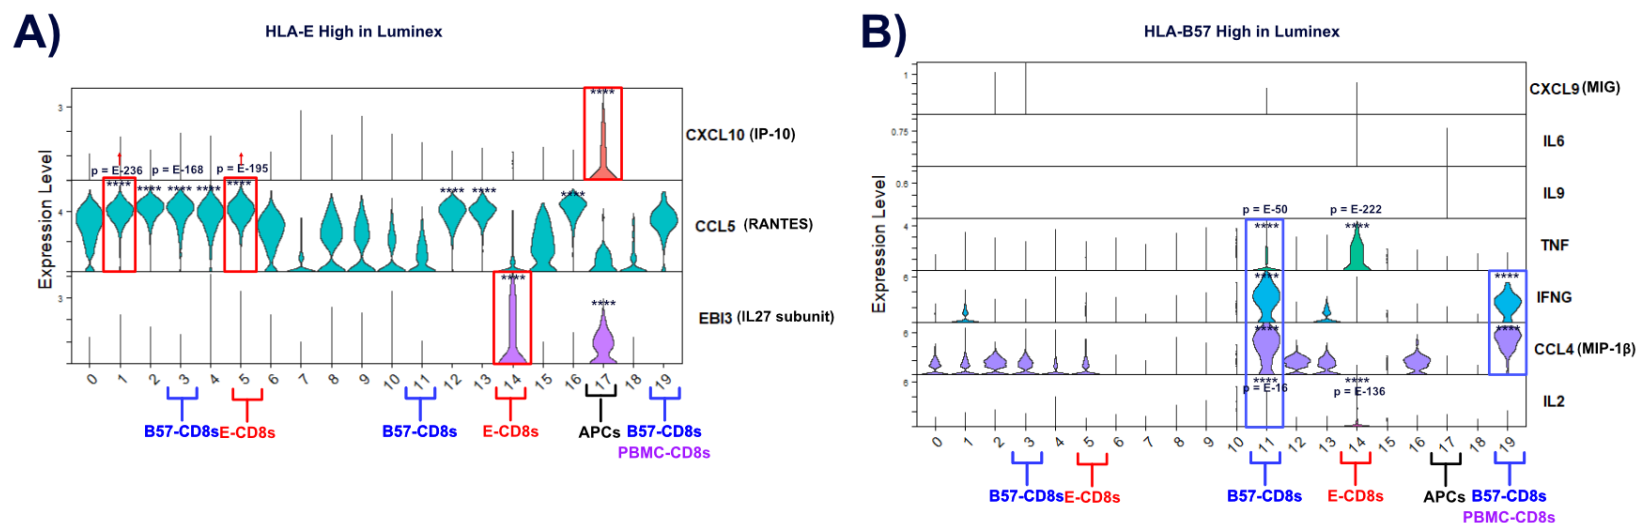

**Supplemental Figure 3: Several secreted Cytokines and chemokines Confirmed to be Expressed within Appropriate HLA-restricted CD8s.** Violin plot of RNA expression for those cytokines identified through high-parameter Luminex in HLA-restricted co-culture within 10X Seurat clusters. **A)** HLA-E- or **B)** -B57-restricted cytokines which are significantly increasing compared to all other clusters by MAST are boxed in red or blue respectively. Relevant clusters are marked as E-CD8s or B57-CD8s below depending on relative number of cells for HLA-restricted metadata in those clusters. Exact p values are given when given cytokine is positive in more than 1 cluster and in both an —CD8 and B57-CD8 cluster for comparison. All p values given are FDR-corrected ( $p = 0.05, 0.01, 0.001, 0.0001$  represented as \*, \*\*, \*\*\*, \*\*\*\* respectively) .

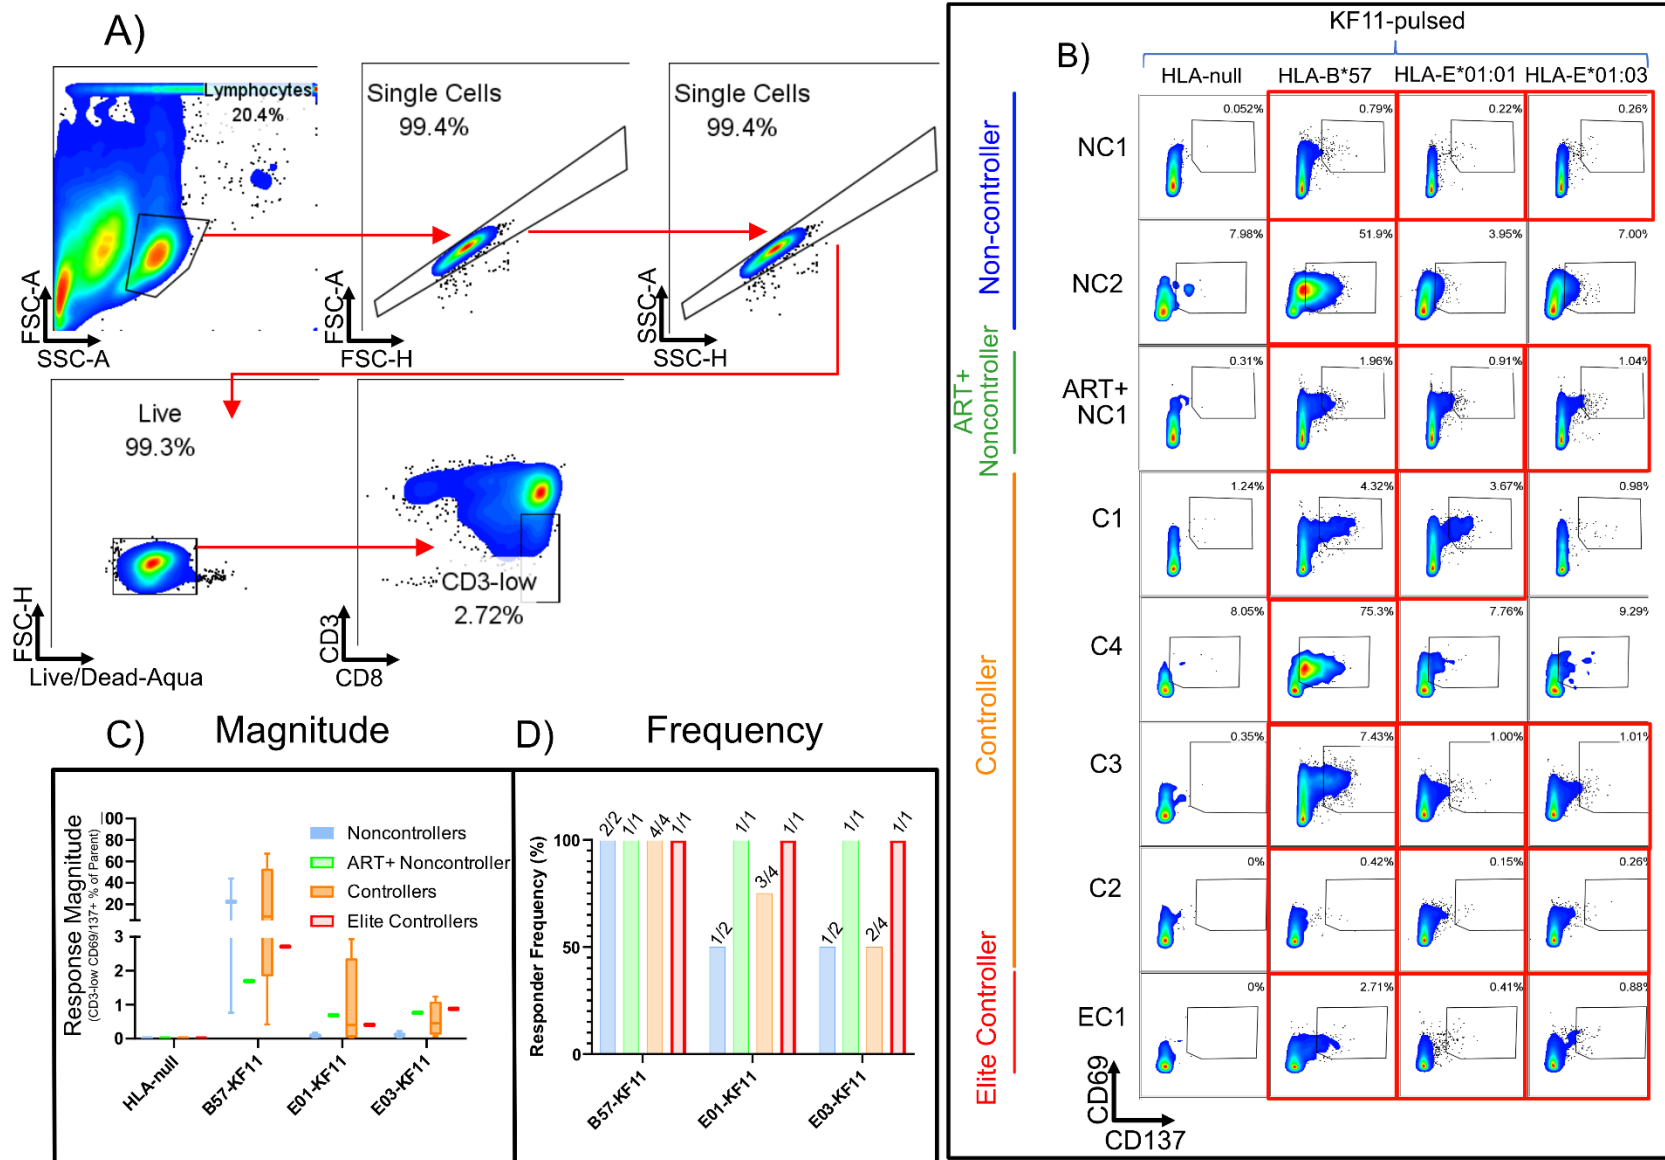

**Supplemental Figure 4: Gating strategy and response magnitude for CD3-low HLA-class I restricted responses. A)** Gating strategy for identifying CD3-low CD8+ T cells. **B)** Response magnitude of dually activated (CD69+ CD137+) CD3-low high avidity HLA-restricted CD8+ T cells to KF11 in each HLA group. **C)** Graph showing magnitude of CD69+ CD137+ response shown in (B). **D)** Bar graph showing response frequency among noncontrollers, ART-suppressed noncontroller, controllers, and elite controller in cohort relative to HLA-B\*57:01-, E\*01:01-, and E\*01:03-restricted KF11 from (B).

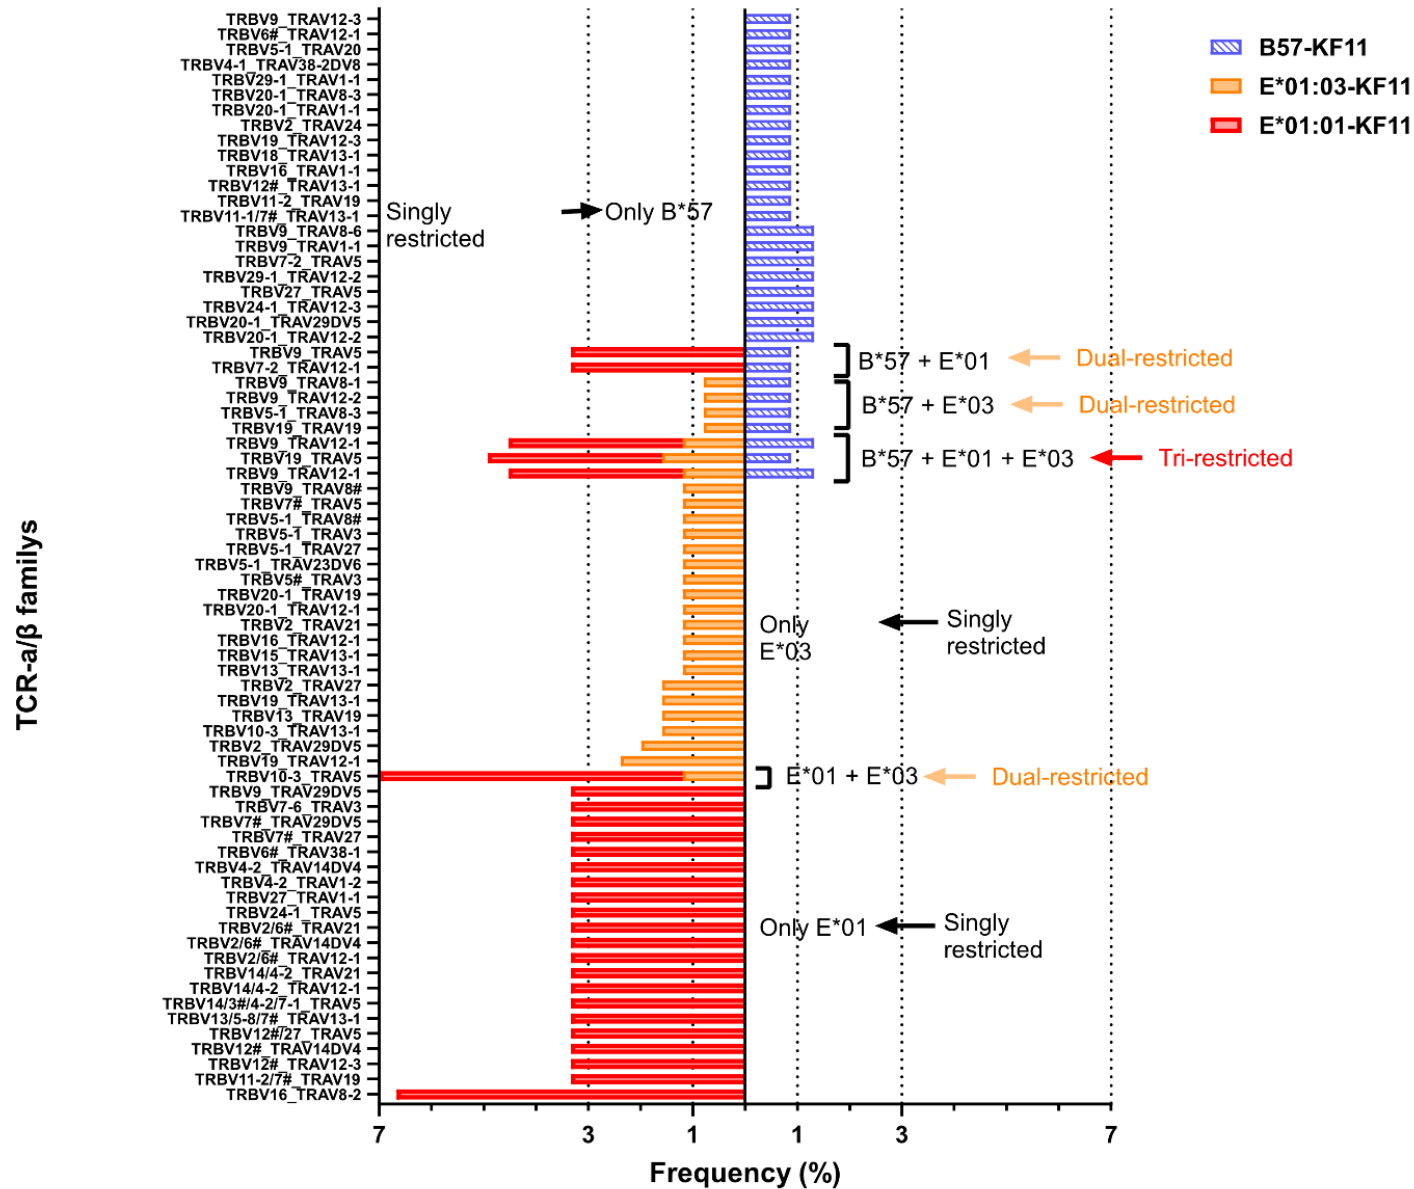

**Supplemental Figure 5: Pyramid plot of TCR cross-restriction in one PWH.** Pyramid plot in same style as Figure 2A, but for a single PWH to show cross-restriction at the donor level in activated CD8s.

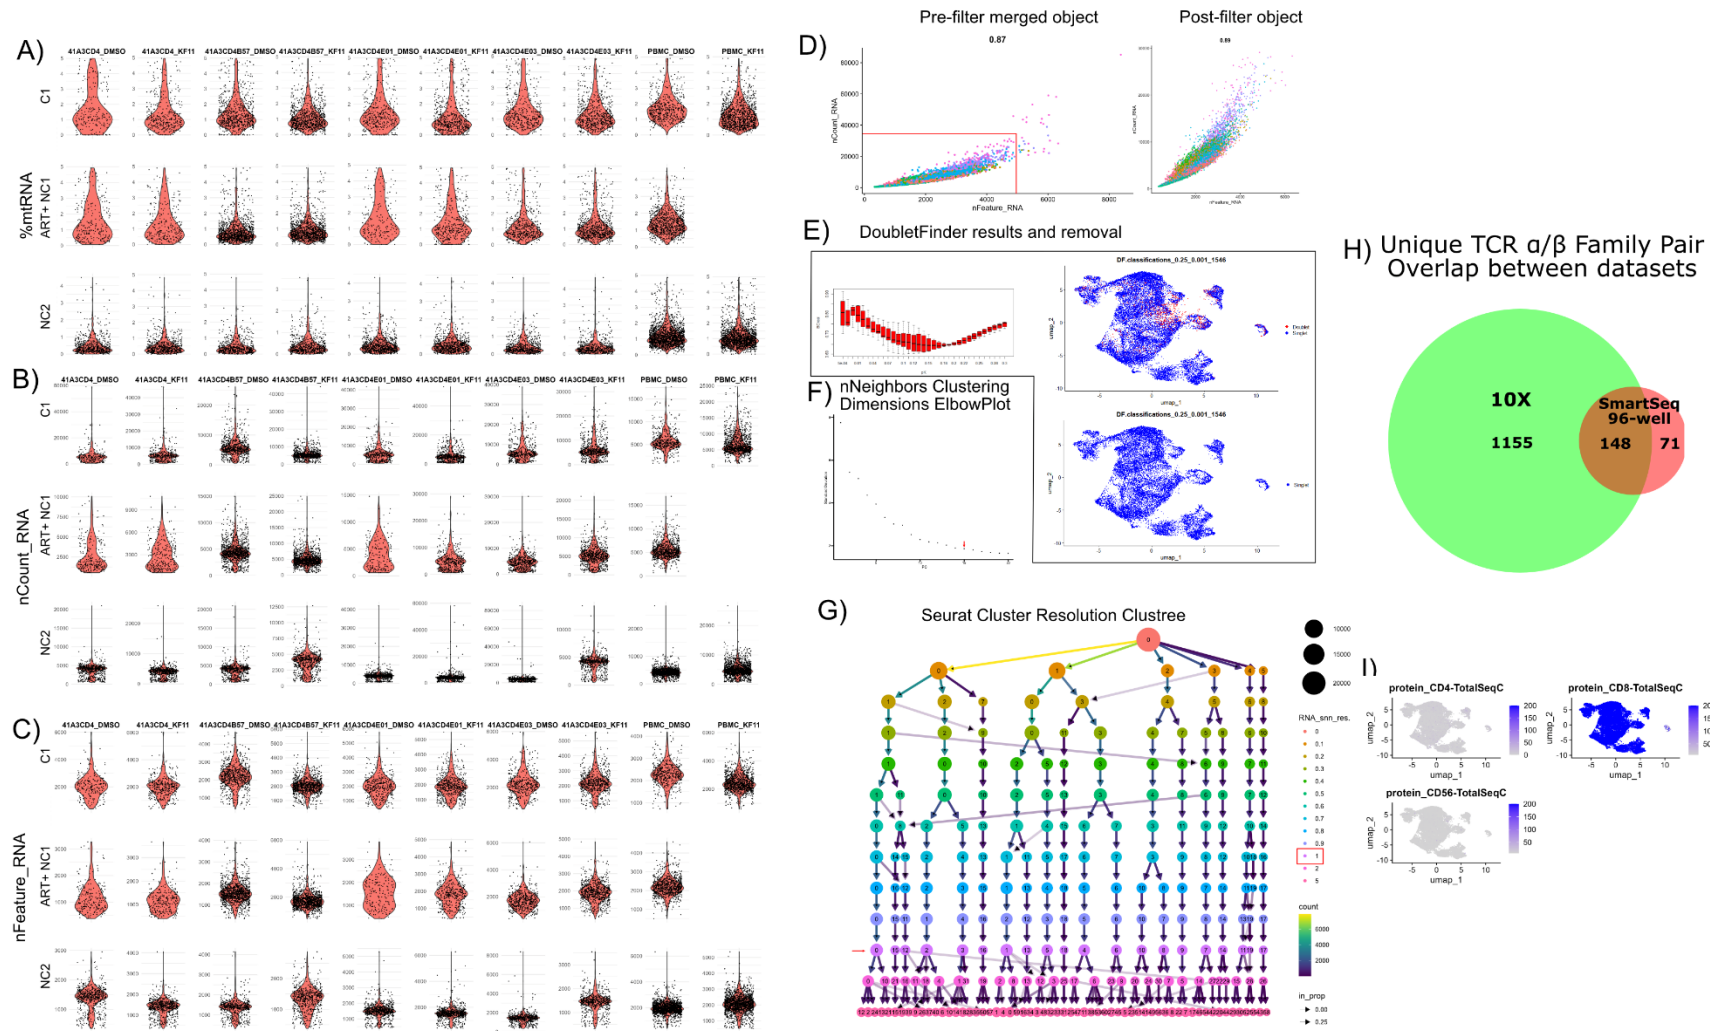

**Supplemental Figure 6: 10X genomics QC metrics.** Violin plots by donor (rows) and condition (columns) for post-filtered **A)** %miRNA, **B)** nCount\_RNA, and **C)** nFeature\_RNA values of merged dataset are shown. **D)** Scatterplot showing nCount\_RNA to nFeature\_RNA pre- and post-98<sup>th</sup> percentile filtering in an attempt to remove outliers from dataset. Additional **E)** DoubletFinder filtering used to more specifically identify and remove potential doublets. Left boxplot of BCR real vs pK simulation used to find optimal pK setting in package to identify potential doublets within dimplot shown at upper right. Lower-right dimplot represents post-filtered merged dataset. **F)** Elbowplot was used to determine optimal number of dimensions on which to plot the UMAP. **G)** Clustree used to determine optimal resolution which best identified distinct clusters of transcriptionally distinct CD8s that were not “overclustered”, or do not have substantial cross-assignment to non-existent distinct clusters, as represented by non-opaque arrows. **H)** Overlap of unique TCR  $\alpha/\beta$  family pairs observed in antigen-specific CD3-low high avidity scTCR-seq data and 10X scTCR-seq data.



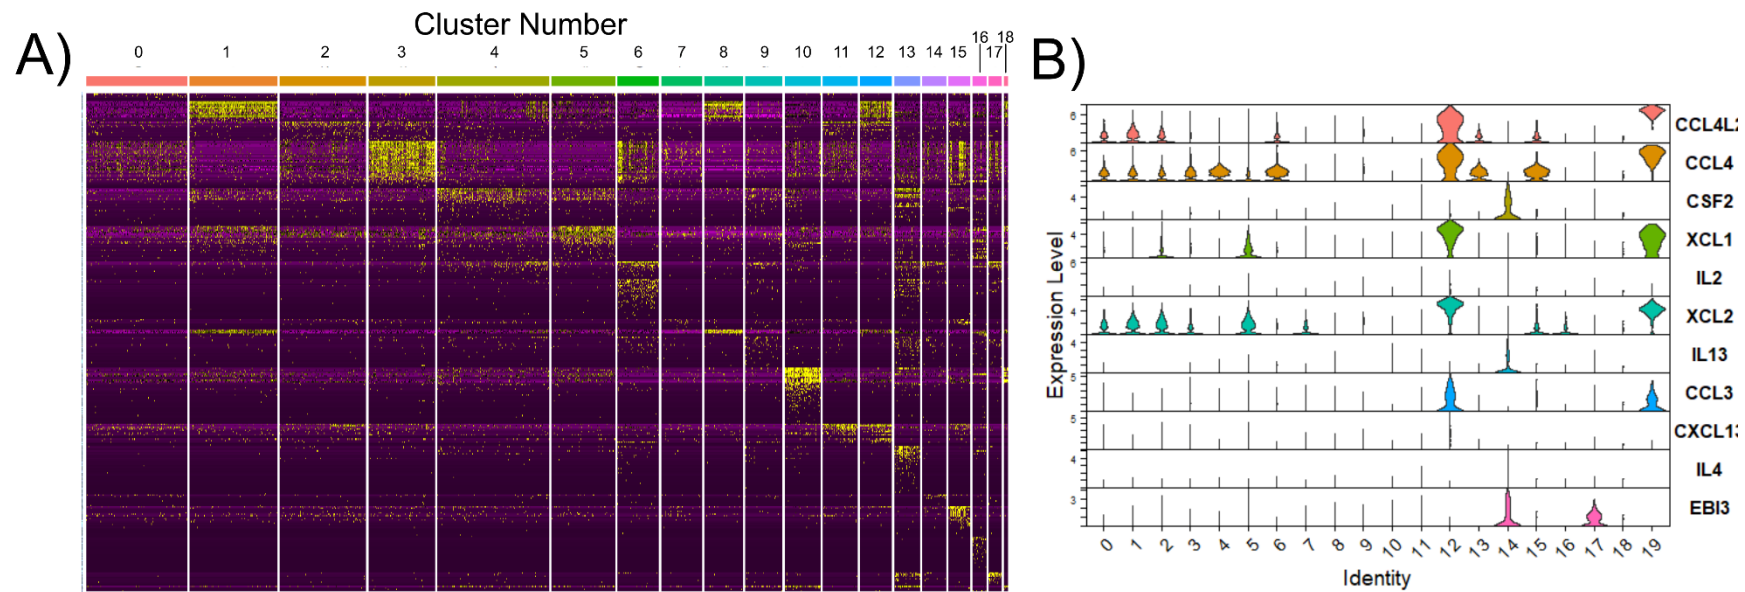

**Supplemental Figure 7: Clusters have distinct transcriptional profiles. A)** Dim Heatmap of top 50 markers identified per cluster by MAST, unlabeled. **B)** Violinplot of top variable cytokines across dataset separated by cluster.

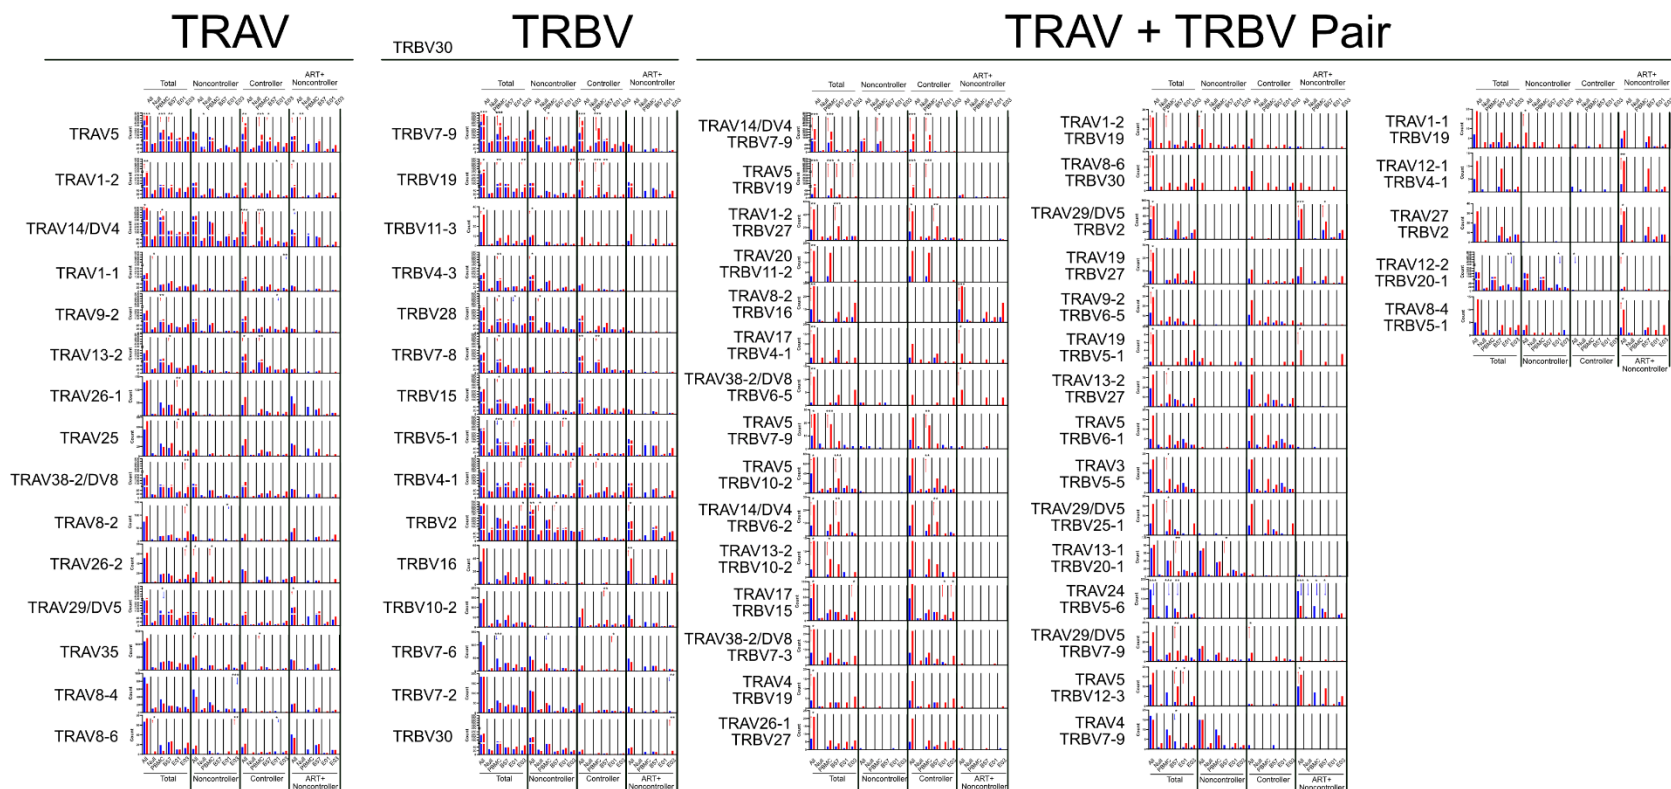

**Supplemental Figure 8: Stacked bar graph summary of significantly increasing  $\alpha$ ,  $\beta$ , or  $\alpha/\beta$  paired families.** Bar graphs of significantly increasing A)  $\alpha$ , B)  $\beta$ , or C)  $\alpha/\beta$  paired families showing count of each family or paired family as blue for unstimulated or red for stimulated, separated by first control status (Total, noncontroller, controller, ART-suppressed noncontroller) and sub-set by HLA status within those control statuses (All, Null, PBMC, B57, E01, and E03). Red up arrow and blue down arrow indicates increasing or decreasing family within the indicated metadata combination. Significance determined through novel Chi-squared comparison of count of cells between unstimulated and stimulated compared to counts of indicated family or family pair between unstimulated and stimulated metadata combination. ART-suppressed noncontroller PBMC data not available due to sorting error (1 out of 30 conditions), and so no significance applicable in that condition. Significance of increase or decrease indicated above (\*, \*\*, \*\*\*, \*\*\*\* mean  $p < 0.05, 0.01, 0.001, 0.0001$  respectively).



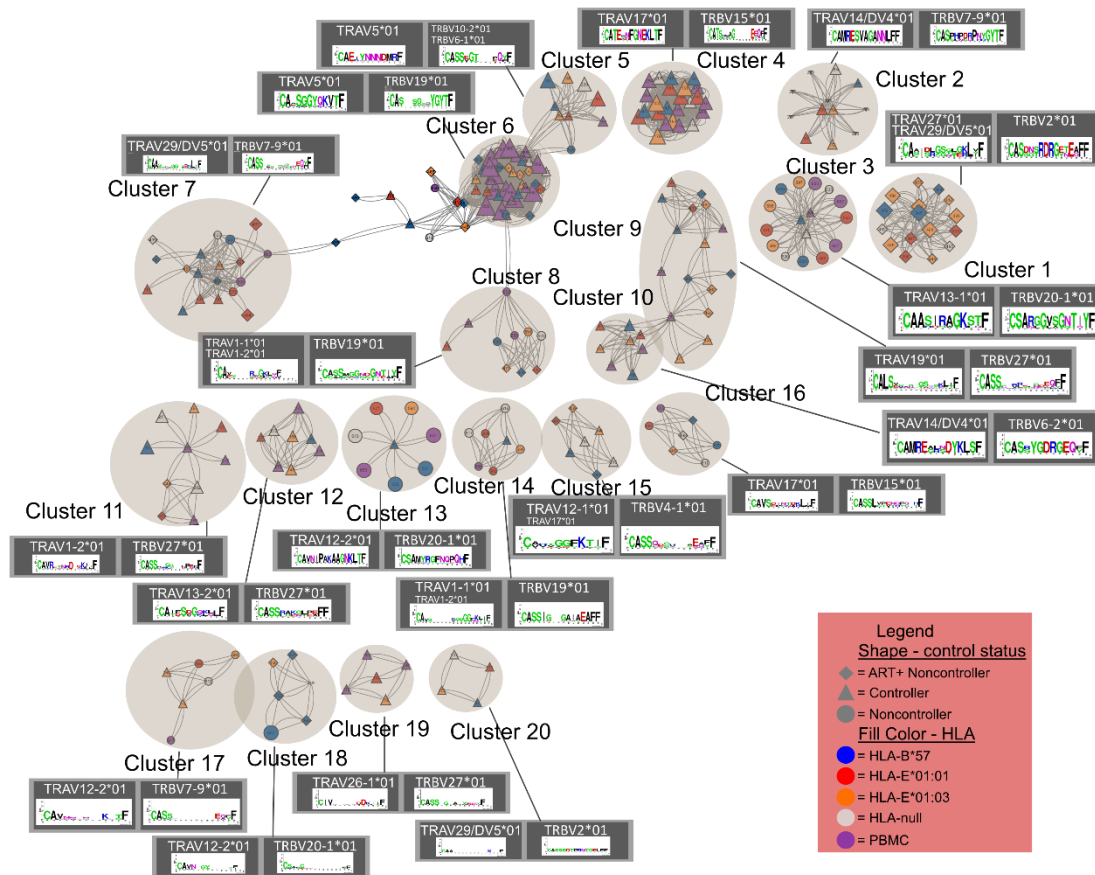

**Supplemental Figure 9: Antigen-specific clonotypes are multiply HLA-I restricted.** TCRdist3 distance matrix-based clustering of KF11 stimulated significantly increasing  $\alpha/\beta$  pair family clonotypes above proportion and TDU cutoffs. With increased cell number and therefore cluster number, clusters are labeled for reference in text. TCR families included in each cluster are also labeled by cluster alongside a Logo plot detailing the CDR3 sequences therein. PBMC, Null-, HLA-B\*57:01-, E\*01:01-, and E\*01:03-restricted clonotypes are colored in purple, gray, blue, red, and orange respectively. Clonotypes identified in noncontrollers are represented as circles, while those in controllers and the ART-suppressed noncontroller are represented as triangles and diamonds respectively.

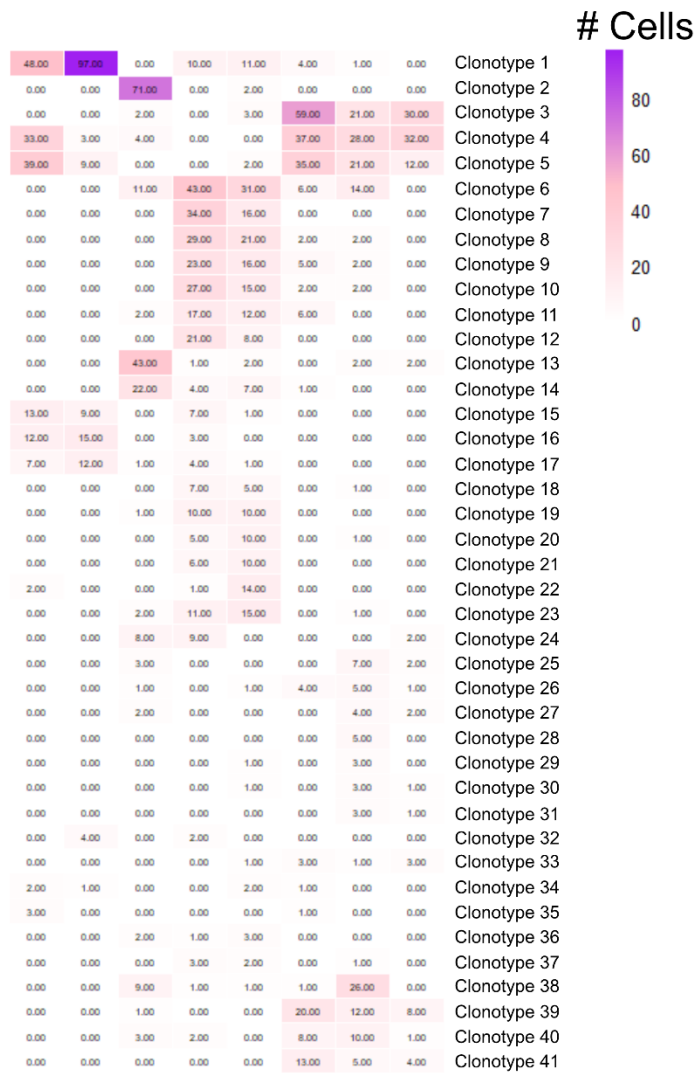

5 6 3 0 1 2 4 7 Cluster

**Supplemental Figure 10: Antigen-specific HLA-restricted clonotypes are transcriptionally distinct from one another.** Heatmap of number cells with paired TCR clonotype sequence metadata (unique clonotype paired sequence 1, 2, 3, etc.) found within each Seurat cluster within the ag-specific subset of 10X data.

B)

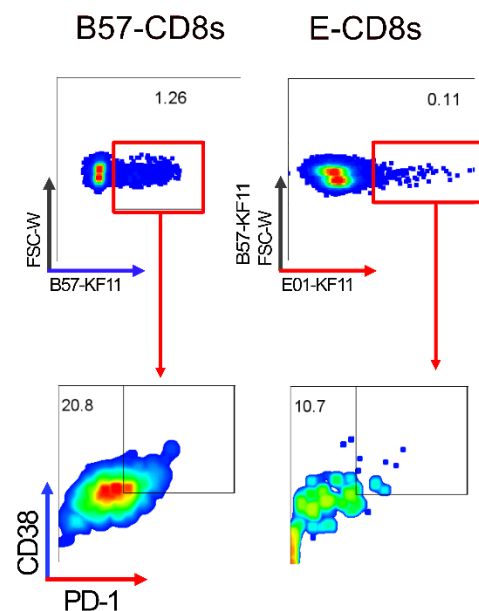

A) HLA-B\*57 restricted

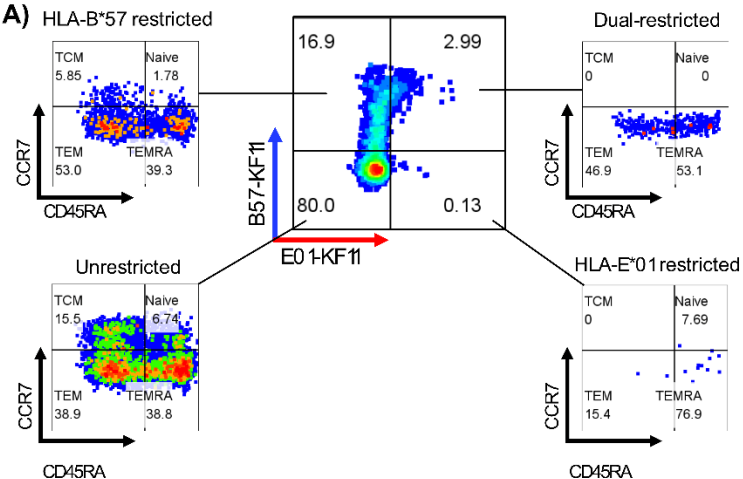

**Figure S11: Gating for Dextramer staining based examination of CD8 Memory and Exhaustion. A)** Representative gating for CD38+ PD1+ exhaustion within all B57-CD8s or E-CD8s within cohort. **B)** Memory state of all 4 quadrants of B57+/- and E01-KF11 +/- dextramer PWH EC2  $\alpha\beta$ . Representative graph of memory state (CD45RA vs CCR7) within each dextramer-positive quadrant shown. Same gating used to determine memory state across rest of cohort.

**Supplemental Table 1: Cohort demographics.** Table for all donor samples used in study. Control status determined as stated in text for noncontrollers (NC), controllers (C), and elite controllers (EC) having a plasma viral load >2000 , <2000, or <200 cp/mL respectively. “KF11 ELISPOT IFN $\gamma$  SFU/1e6 cells” shows ELISPOT IFN $\gamma$  response magnitude of indicated donor PBMCs to KF11 peptide if tested based on sample availability.

| Status  | Alternate ID | Viral Load (cp/mL) | HLA-A1  | HLA-A2  | HLA-B1  | HLA-B2 | KF11 ELISPOT IFN $\gamma$ SFU/1e6 cells |
|---------|--------------|--------------------|---------|---------|---------|--------|-----------------------------------------|
| C 1     | Ci10004      | 253                | A*03:01 | A*30:02 | B*07:02 | B*57   | 2400                                    |
| C 2     | Ci10060      | 722                | A*01:01 | A*33:01 | B*42:01 | B*57   | 415                                     |
| C 3     | Ci10067      | 215                | A*30:02 | A*33:01 | B*13:02 | B*57   | 610                                     |
| C 4     | Ci20018      | 1886               | A*02:01 | A*26:01 | B*40:01 | B*57   | 1520                                    |
| EC 1    | Ci10071      | 49                 | A*01:01 | A*66:02 | B*8:01  | B*57   | 730                                     |
| ART+ NC | Ci10074      | 49                 | A*01:01 | A*26:01 | B*8:01  | B*57   | 770                                     |
| NC 1    | Ci10027      | 4827               | A*01:01 | A*02:01 | B*8:01  | B*57   | 714                                     |
| NC 2    | Ci10076      | 17693              | A*02:01 | A*30:02 | B*35:01 | B*57   | N/A                                     |
| EC 2    | 8219         | 47                 | A*02:01 | A*30:02 | B*07:05 | B*57   | 2737                                    |
| PWO 1   |              | 0                  | A*30:01 | A*68:02 | B*42:01 | B*57   | N/A                                     |

**Supplemental Table 2: Antibody List - Sorting.** Table for all antibodies describing the marker, fluorophore, clone, company source, and catalog number for the antibody “sorting mix” referenced in Methods section.

| Marker    | Fluorophore | Clone  | Company    | Catalog #  |
|-----------|-------------|--------|------------|------------|
| Live-dead | Aqua        | N/A    | Invitrogen | L34957     |
| CD3       | PacBlue     | UCHT1  | BD         | 558117     |
| CD4       | A780        | RPA-T4 | Invitrogen | 47-0049-42 |
| CD8       | A700        | RPA-T8 | BD         | 561453     |
| CD14      | PerCP-Cy5.5 | M5E2   | BD         | 550787     |
| CD16      | PerCP-Cy5.5 | 3G8    | BD         | 560717     |
| CD19      | PerCP-Cy5.5 | SJ25C1 | BD         | 340951     |
| CD56      | PerCP-Cy5.5 | B159   | BD         | 560842     |
| CD69      | APC         | FN50   | BD         | 555533     |
| CD137     | PE          | 4B4-1  | BD         | 555956     |
| CD94      | PE-Cy7      | DX22   | Biolegend  | 305516     |
| CD107a    | FITC        | H4A3   | BD         | 555800     |

**Supplemental Table 3: Antibody List – Multimer Testing.** Table for all antibodies describing the marker, fluorophore, clone, company source, and catalog number for the antibody “multimer staining mix” referenced in Methods section.

| Marker      | Fluorophore         | Clone    | Company     | Catalog #     |
|-------------|---------------------|----------|-------------|---------------|
| Live-dead   | Zombie Aqua         | N/A      | Invitrogen  | L34957        |
| CCR7        | RealBlue 705        | 3D12     | BD          | 756922        |
| CD3         | A780                | UCHT1    | Invitrogen  | 47-0038-42    |
| CD4         | BV711               | SK3      | Biolegend   | 344648        |
| CD8         | PE-Texas Red        | 3B5      | Invitrogen  | MHCD0817      |
| CD14        | BUV563              | MφP9     | BD          | 741441        |
| CD16        | BUV563              | B73.1    | BD          | 741449        |
| CD19        | BUV563              | SJ25C1   | BD          | 612916        |
| CD56        | BUV805              | B159     | BD          | 742022        |
| CD94        | PE-Cy7              | DX22     | Biolegend   | 305516        |
| CD38        | StarBright Blue 615 | AT13/5   | BioRad      | MCA1019SBB615 |
| PD1         | BV650               | J105     | Invitrogen  | 41-627-9942   |
| CD45RA      | StarBright Blue 765 | F8-11-13 | BioRad      | MCA88SBB765   |
| KLRC1/NKG2A | mFluor Violet 610   | 131411   | Novus       | FAB1059MFV610 |
| KLRC2/NKG2C | A700                | 134522   | R&D Systems | FAB1381N      |
| TCR-a/B     | BUV737              | IP26     | BD          | 749196        |
| CD57        | BV785               | QA17A04  | Biolegend   | 393330        |
